# Supplementary material
Source: MDPI journal article supplement (https://www.mdpi.com/2073-4395/9/7/345)
Supplement: s1 [file s1]

# Identification of Barley (*Hordeum vulgare* L. subsp. *vulgare*) Root Exudates Allelochemicals, Their Autoallelopathic Activity and Against *Bromus diandrus* Roth. Germination

Imen Bouhaouel<sup>1,2\*</sup>, Gaëtan Richard<sup>3</sup>, Marie-Laure Fauconnier<sup>3</sup>, Marc Ongena<sup>4</sup>, Laurent Franzil<sup>4</sup>, Aurélie Gfeller<sup>1,a</sup>, Hajer Slim Amara<sup>2</sup> and Patrick du Jardin<sup>1</sup>

**Table S1.** Physico-chemical proprieties of the growing substrates. Values are means  $\pm$  SE of four replicates and different letters indicate significant differences at  $p \leq 0.05$  (LSD test).

|                           | Sandy substrat                | Sandy-clay-loam substrate      |
|---------------------------|-------------------------------|--------------------------------|
| Sand (%)                  | 100 $\pm$ 0.0 <sup>a</sup>    | 68.51 $\pm$ 0.0 <sup>b</sup>   |
| Silt (%)                  | 0 $\pm$ 0.0 <sup>a</sup>      | 8.08 $\pm$ 0.0 <sup>b</sup>    |
| Clay (%)                  | 0 $\pm$ 0.0 <sup>a</sup>      | 24.61 $\pm$ 0.0 <sup>b</sup>   |
| pH                        | 7.71 $\pm$ 0.05 <sup>a</sup>  | 8.35 $\pm$ 0.05 <sup>b</sup>   |
| CE (dS m <sup>-1</sup> )  | 75.20 $\pm$ 1.43 <sup>a</sup> | 275.33 $\pm$ 5.00 <sup>b</sup> |
| OM (%)                    | 0.18 $\pm$ 0.04 <sup>a</sup>  | 1.29 $\pm$ 0.14 <sup>b</sup>   |
| C (%)                     | 0.10 $\pm$ 0.02 <sup>a</sup>  | 0.75 $\pm$ 0.08 <sup>b</sup>   |
| N (g kg <sup>-1</sup> )   | 0.23 $\pm$ 0.05 <sup>a</sup>  | 0.57 $\pm$ 0.12 <sup>b</sup>   |
| P (mg kg <sup>-1</sup> )  | 3.25 $\pm$ 0.25 <sup>a</sup>  | 12.26 $\pm$ 0.02 <sup>b</sup>  |
| K (mg kg <sup>-1</sup> )  | 10.00 $\pm$ 1.00 <sup>a</sup> | 30.00 $\pm$ 0.01 <sup>b</sup>  |
| Ca (mg kg <sup>-1</sup> ) | 17.00 $\pm$ 2.00 <sup>a</sup> | 285.00 $\pm$ 5.00 <sup>b</sup> |
| Na (mg kg <sup>-1</sup> ) | 13.50 $\pm$ 3.5 <sup>a</sup>  | 20.00 $\pm$ 5.00 <sup>a</sup>  |

OM: organic matter; EC: electrical conductivity.

**Table S2.** Inhibition rate of root and shoot length, and root and shoot dry weight of great brome (*B. diandrus*) grown in sandy and sandy-clay-loam substrates in which the six barley genotypes had previously developed for one month before being removed. Values are means of five replicates  $\pm$  SE and different letters indicate significant differences at  $p \leq 0.05$  (LSD test).

|           | Sandy substrat                 |                                 |                                    |                                     | Sandy-clay-loam substrate      |                                 |                                    |                                     |
|-----------|--------------------------------|---------------------------------|------------------------------------|-------------------------------------|--------------------------------|---------------------------------|------------------------------------|-------------------------------------|
|           | Inhibition rate of root length | Inhibition rate of shoot length | Inhibition rate of root dry weight | Inhibition rate of shoot dry weight | Inhibition rate of root length | Inhibition rate of shoot length | Inhibition rate of root dry weight | Inhibition rate of shoot dry weight |
| Manel     | 8.73 $\pm$ 2.41 <sup>a</sup>   | 12.51 $\pm$ 2.51 <sup>a</sup>   | 8.65 $\pm$ 1.93 <sup>a</sup>       | 9.59 $\pm$ 3.09 <sup>a</sup>        | 4.97 $\pm$ 0.44 <sup>a</sup>   | 8.06 $\pm$ 0.88 <sup>a</sup>    | 3.85 $\pm$ 1.65 <sup>a</sup>       | 3.54 $\pm$ 2.86 <sup>a</sup>        |
| Tej       | 9.23 $\pm$ 0.42 <sup>a</sup>   | 9.67 $\pm$ 1.44 <sup>a</sup>    | 9.04 $\pm$ 0.73 <sup>b</sup>       | 11.56 $\pm$ 3.11 <sup>a</sup>       | 11.74 $\pm$ 1.41 <sup>a</sup>  | 7.73 $\pm$ 3.21 <sup>a</sup>    | 9.48 $\pm$ 2.63 <sup>b</sup>       | 6.21 $\pm$ 1.35 <sup>a</sup>        |
| Rihane    | 25.21 $\pm$ 1.53 <sup>b</sup>  | 24.87 $\pm$ 1.97 <sup>b</sup>   | 18.98 $\pm$ 0.81 <sup>c</sup>      | 15.42 $\pm$ 1.42 <sup>b</sup>       | 18.41 $\pm$ 3.07 <sup>b</sup>  | 15.03 $\pm$ 2.76 <sup>a</sup>   | 6.70 $\pm$ 0.26 <sup>ab</sup>      | 7.21 $\pm$ 1.39 <sup>a</sup>        |
| Arbi      | 40.17 $\pm$ 1.49 <sup>c</sup>  | 33.37 $\pm$ 0.74 <sup>cd</sup>  | 28.19 $\pm$ 2.72 <sup>d</sup>      | 31.07 $\pm$ 1.93 <sup>c</sup>       | 25.47 $\pm$ 1.40 <sup>c</sup>  | 24.71 $\pm$ 2.69 <sup>bc</sup>  | 23.32 $\pm$ 2.48 <sup>c</sup>      | 17.53 $\pm$ 1.44 <sup>b</sup>       |
| Ardhao ui | 41.39 $\pm$ 1.79 <sup>c</sup>  | 30.00 $\pm$ 1.17 <sup>c</sup>   | 29.87 $\pm$ 1.81 <sup>cd</sup>     | 26.21 $\pm$ 0.41 <sup>c</sup>       | 22.75 $\pm$ 2.45 <sup>c</sup>  | 27.72 $\pm$ 1.29 <sup>b</sup>   | 20.67 $\pm$ 0.70 <sup>c</sup>      | 9.37 $\pm$ 2.94 <sup>a</sup>        |
| Saudi     | 42.05 $\pm$ 1.86 <sup>c</sup>  | 36.37 $\pm$ 1.80 <sup>d</sup>   | 29.36 $\pm$ 2.56 <sup>d</sup>      | 33.06 $\pm$ 1.95 <sup>c</sup>       | 28.36 $\pm$ 1.93 <sup>c</sup>  | 24.09 $\pm$ 1.49 <sup>c</sup>   | 22.63 $\pm$ 0.90 <sup>c</sup>      | 18.17 $\pm$ 2.38 <sup>b</sup>       |

**Table S3.** Total phenolic acid content (mg / g soil) according to tested genotypes of barley and type of substrate. Values represent the mean  $\pm$  SE of five replicates and different letters indicate significant differences at  $p \leq 0.05$  (LSD test).

|          | Sandy substrat       | Sandy-clay-loam substrate |
|----------|----------------------|---------------------------|
| Control  | $0.21 \pm 0.00^a$    | $0.23 \pm 0.01^a$         |
| Manel    | $0.31 \pm 0.01^b$    | $0.29 \pm 0.04^{ab}$      |
| Tej      | $0.32 \pm 0.01^b$    | $0.29 \pm 0.03^{ab}$      |
| Rihane   | $0.29 \pm 0.02^{ab}$ | $0.29 \pm 0.01^{ab}$      |
| Arbi     | $0.58 \pm 0.04^c$    | $0.36 \pm 0.04^{bc}$      |
| Ardhaoui | $0.36 \pm 0.04^b$    | $0.39 \pm 0.00^c$         |
| Saudi    | $0.58 \pm 0.04^c$    | $0.38 \pm 0.03^c$         |

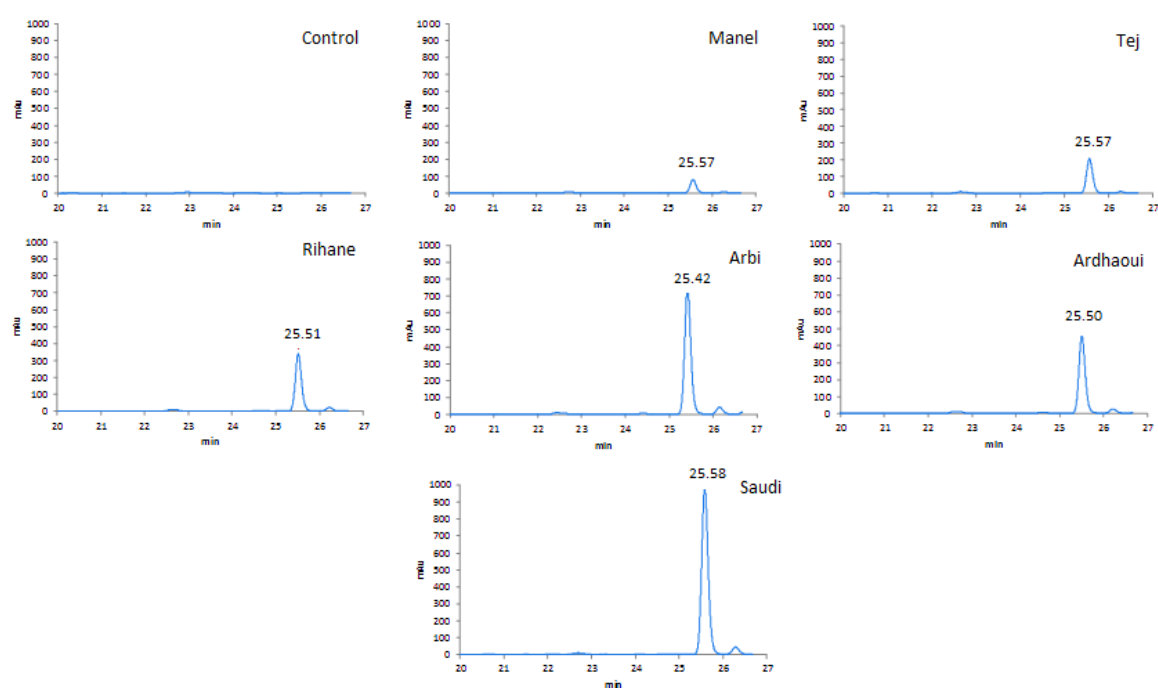

**Figure S1.** Chromatograms of sandy soil extracts of the control and of those pre-cultivated by the six barley genotypes detected at 330 nm.
